# Supplementary material for: Glycosaminoglycan-based biomaterials for growth factor and cytokine delivery: Making the right choices
Source: PubMed Central journal article supplement (PMC6900262; doi:10.1016/j.jconrel.2019.10.018), 2019-11-10
Supplement: mmc4.pdf [file mmc4.pdf]

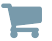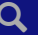

Journal

**Biomatter** >

Volume 1, 2011 - Issue 2

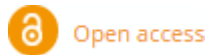

Open access

243 | 12

Views

| CrossRef citations to date

| 1

| Altmetric

Report

# Development of affinity-based delivery of NGF from a chondroitin sulfate biomaterial

Karen Chao Butterfield, Aaron W. Conovaloff & Alyssa Panitch 

Pages 174-181 | Received 21 Jul 2011, Accepted 16 Nov 2011, Published online: 01 Oct 2011

 Download citation  <https://doi.org/10.4161/biom.18791> Full Article Figures & data References Citations Metrics Licensing PDF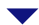

Copyright © Landes Bioscience

This is an open-access article licensed under a Creative Commons Attribution-NonCommercial 3.0 Unported License. The article may be redistributed, reproduced, and reused for non-commercial purposes, provided the original source is properly cited.

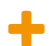

People also read

Brief report

[Effects of a synthetic chondroitin sulfate derivative on growth and](#)
